# Supplementary material
Source: MDPI journal article supplement (https://www.mdpi.com/2073-4441/14/20/3253)
Supplement: s1 [file s1]

**Table S1.** A list of zooplankton taxa and abbreviations in Danjiangkou Reservoir, and their occurrence in each sampling month and area. HR: Hanjiang reservoir area, DR: Danjiang reservoir area, BD: the area close to the dam. +: present; -: absent.

| Group    | Taxa                           | Taxa code | Functional groups | Month |        |          | Area |    |    |
|----------|--------------------------------|-----------|-------------------|-------|--------|----------|------|----|----|
|          |                                |           |                   | May   | August | November | BD   | HR | DR |
| Protozoa | <i>Acanthocystis aculeata</i>  | Acaa      | PF                | +     | -      | -        | -    | +  | -  |
|          | <i>Chilodonella algivora</i>   | Chia      | PF                | +     | -      | -        | +    | +  | -  |
|          | undetermined ciliates          | Cil       | PF                | +     | -      | +        | +    | +  | +  |
|          | <i>Coleps hirtus</i>           | Colh      | PF                | +     | -      | -        | -    | +  | -  |
|          | <i>Cyclidium</i> sp.           | Cyc       | PF                | -     | -      | +        | -    | +  | -  |
|          | <i>Didinium nasutum</i>        | Didn      | PC                | +     | -      | -        | -    | +  | -  |
|          | <i>Diffugia globulosa</i>      | Difg      | PF                | -     | +      | -        | +    | +  | +  |
|          | <i>Glaucoma scintillans</i>    | Glas      | PF                | +     | -      | -        | -    | +  | +  |
|          | <i>Halteria cirrifera</i>      | Halc      | PF                | +     | -      | -        | +    | +  | +  |
|          | <i>Lacrymaria olor</i>         | Laco      | PC                | -     | +      | +        | +    | +  | -  |
|          | <i>Nassula gracilis</i>        | Nasg      | PF                | +     | -      | -        | +    | -  | -  |
|          | <i>Strobilidium gyrans</i>     | Strg      | PF                | +     | +      | +        | +    | +  | +  |
|          | <i>Strombidium viride</i>      | Strv      | PF                | +     | +      | +        | +    | +  | +  |
|          | <i>Tetrahymena pyriformis</i>  | Tetp      | PF                | -     | +      | -        | -    | +  | -  |
|          | <i>Tintinnidium fluviatile</i> | Tinf      | PF                | +     | -      | -        | +    | +  | -  |
|          | <i>Vorticella</i> sp.          | Vor       | PF                | +     | +      | +        | -    | +  | +  |
|          | <i>Vorticella elongata</i>     | Vore      | PF                | -     | +      | -        | -    | +  | -  |
| Rotifera | <i>Anuraeopsis coelata</i>     | Anuc      | RF                | +     | -      | -        | -    | -  | +  |
|          | <i>Anuraeopsis fissa</i>       | Anuf      | RF                | -     | +      | -        | +    | +  | -  |
|          | <i>Ascomorpha saltans</i>      | Ascs      | RF                | +     | +      | -        | +    | +  | +  |
|          | <i>Asplanchna brightwelli</i>  | Aspb      | RC                | +     | -      | -        | -    | +  | -  |
|          | <i>Asplanchna priodonta</i>    | Aspp      | RC                | -     | +      | -        | -    | +  | -  |

|           |                                        |       |     |   |   |   |   |   |   |
|-----------|----------------------------------------|-------|-----|---|---|---|---|---|---|
|           | <i>Brachionus angularis orientalis</i> | Braa  | RF  | - | + | - | - | + | - |
|           | <i>Brachionus falcatus</i>             | Braf  | RF  | - | + | - | - | + | - |
|           | <i>Brachionus forficula</i>            | Brafo | RF  | - | + | - | - | + | + |
|           | <i>Collotheca pelagica</i>             | Colp  | RF  | - | + | + | - | + | + |
|           | <i>Encentrum</i> sp.                   | Enc   | RF  | - | + | - | + | - | + |
|           | <i>Epiphanes senta</i>                 | Epis  | RF  | - | + | - | - | + | - |
|           | <i>Euchlanis dilatata</i>              | Eucd  | RF  | + | - | - | - | - | + |
|           | <i>Filinia longiseta</i>               | Fill  | RF  | + | - | - | - | - | + |
|           | <i>Hexarthra mira</i>                  | Hexm  | RF  | - | + | - | + | + | + |
|           | <i>Keratella cochlearis</i>            | Kerc  | RF  | + | + | + | + | + | + |
|           | <i>Keratella serrulata</i>             | Kers  | RF  | - | + | - | - | - | + |
|           | <i>Keratella valga</i>                 | Kerv  | RF  | + | - | - | - | + | - |
|           | <i>Ploesoma hudsoni</i>                | Ploh  | RF  | - | + | - | + | - | - |
|           | <i>Polyarthra dolichoptera</i>         | Pold  | RF  | - | + | + | + | + | + |
|           | <i>Polyarthra euryptera</i>            | Pole  | RF  | - | - | + | - | + | - |
|           | <i>Polyarthra vulgaris</i>             | Polv  | RF  | + | - | + | - | + | - |
|           | <i>Pompholyx complanta</i>             | Pomc  | RF  | + | - | - | - | - | + |
|           | <i>Synchaeta oblonga</i>               | Syno  | RC  | + | - | - | - | - | + |
|           | <i>Synchaeta pectinata</i>             | Synp  | RC  | + | - | + | - | + | - |
|           | <i>Trichocerca cylindrica</i>          | Tric  | RF  | - | + | - | + | + | - |
|           | <i>Trichocerca pusilla</i>             | Trip  | RF  | + | - | - | + | + | - |
|           | <i>Trichocerca rousseleti</i>          | Trir  | RF  | - | + | + | + | + | + |
|           | <i>Trichocerca similis</i>             | Tris  | RF  | - | + | + | + | + | - |
| Cladocera | <i>Alona guttata</i>                   | Alog  | SCF | + | - | - | - | + | + |
|           | <i>Bosmina coregoni</i>                | Bosc  | SCF | + | + | + | + | + | + |
|           | <i>Ceriodaphnia cornigera</i>          | Cerco | SCF | - | - | + | + | + | - |
|           | <i>Chydorus sphaericus</i>             | Chys  | SCF | + | - | - | - | - | + |

|          |                                |      |     |   |   |   |   |   |   |
|----------|--------------------------------|------|-----|---|---|---|---|---|---|
|          | <i>Coronatella rectangula</i>  | Corr | SCF | + | - | - | - | - | + |
|          | <i>Daphnia cucullata</i>       | Dapc | LCF | + | + | + | + | + | + |
|          | <i>Daphnia galeata</i>         | Dapg | LCF | - | + | - | + | - | - |
|          | <i>Daphnia hyalina</i>         | Daph | LCF | + | - | - | + | + | + |
|          | <i>Diaphanosoma brachyurum</i> | Diab | MCF | - | - | + | - | + | - |
|          | <i>Diaphanosoma dubium</i>     | Diad | MCF | - | + | - | + | + | + |
| Copepoda | Calanoida copepodids           | Canc | SCF | + | + | + | + | + | + |
|          | Cyclopoida copepodids          | Cycc | SCC | + | + | + | + | + | + |
|          | <i>Cyclops vicinus</i>         | Cycv | LCC | + | - | + | + | + | + |
|          | <i>Eucyclops serrulatus</i>    | Eucs | MCF | + | - | - | - | - | + |
|          | <i>Mesocyclops leuckarti</i>   | Mesl | MCC | + | + | + | + | + | + |
|          | <i>Microcyclops varicans</i>   | Micv | MCC | + | + | + | + | + | + |
|          | Copepoda nauplii               | Nau  | SCF | + | + | + | + | + | + |
|          | <i>Neodiaptomus schmackeri</i> | Neos | MCF | - | + | - | + | + | + |
|          | <i>Schmackeria forbesi</i>     | Schf | MCF | + | + | + | + | + | - |
|          | <i>Sinocalanus dorrii</i>      | Sind | LCF | + | - | + | + | + | + |

**Table S2.** Records on the number of taxa (NS), mean abundance (D, ind./L), and mean biomass (B, mg/L) of the four zooplankton taxonomic groups in Danjiangkou Reservoir investigated in this study and documented in the literature, as well as water quality parameters for each period. SD: Secchi disk depth, Chl.*a*: chlorophyll *a*, TN: total nitrogen, TP: total phosphorus, COD<sub>Mn</sub>: permanganate index. NA: not available.

| Sampling time (Year)     | Number of sites | SD (m) | Chl. <i>a</i> (µg/L) | TN (mg/L) | TP (mg/L) | COD <sub>Mn</sub> (mg/L) | Protozoa |        |        | Rotifera |       |       | Cladocera |       |       | Copepoda |        |       | Total |        |       |
|--------------------------|-----------------|--------|----------------------|-----------|-----------|--------------------------|----------|--------|--------|----------|-------|-------|-----------|-------|-------|----------|--------|-------|-------|--------|-------|
|                          |                 |        |                      |           |           |                          | NS       | D      | B      | NS       | D     | B     | NS        | D     | B     | NS       | D      | B     | NS    | D      | B     |
| (1986~1987) <sup>1</sup> | 7               | 1.35   | NA                   | 0.51      | 0.01      | NA                       | 20       | 4922   | 0.1488 | 15       | 1.625 | 0.032 | 11        | 2.560 | 0.128 | 3        | 14.393 | 0.338 | 49    | 4940.6 | 0.646 |
| (1992~1993) <sup>2</sup> | 13              | 2.34   | NA                   | 0.84      | 0.042     | NA                       | 37       | 4540.3 | 0.136  | 51       | 210.6 | 0.072 | 17        | 6.6   | 0.450 | 19       | 24.4   | 0.181 | 124   | 4781.9 | 0.839 |
| (2007~2008) <sup>3</sup> | 22              | 2.61   | 50.99                | 1.31      | 0.058     | NA                       |          |        |        | 62       | 579   | 0.149 |           |       |       |          |        |       |       |        |       |
| (2013~2014) <sup>4</sup> | 8               | NA     | NA                   | NA        | NA        | NA                       |          |        |        |          |       |       | 13        | NA    | NA    | 15       | NA     | NA    |       |        |       |
| 2017-this study          | 10              | 4.65   | 9.19                 | 1.58      | 0.03      | 2.30                     | 17       | 3589.9 | 0.180  | 28       | 164.1 | 0.107 | 10        | 6.255 | 0.269 | 10       | 80.311 | 2.844 | 65    | 3840.5 | 3.400 |

1: Yang et al., 1996; 2: Han et al., 1997; 3: Kong et al., 2010; 4: Wang et al., 2016.

**Table S3.** A list of fish species composition and major characteristics in Danjiangkou Reservoir, compiled from our survey data during 2013–2018 (Yin et al., 2021). L: Limnicolous, P: Potamophilus, RL: River-lake migratory. C: Carnivorous, D: Detritivorous, F: Filtering, H: Herbivorous; O: Omnivorous.

| Order         | Species                              | Trophic category | Ecological category | Artificially stocked or not | Commercial species or not |
|---------------|--------------------------------------|------------------|---------------------|-----------------------------|---------------------------|
| Cypriniformes | <i>Abbottina rivularis</i>           | O                | L                   | No                          | No                        |
|               | <i>Acheilognathus macropterus</i>    | D                | L                   | No                          | No                        |
|               | <i>Aristichthys nobilis</i>          | F                | RL                  | Yes                         | Yes                       |
|               | <i>Carassius auratus</i>             | O                | L                   | No                          | Yes                       |
|               | <i>Cobitis sinensis</i>              | O                | P                   | No                          | No                        |
|               | <i>Ctenopharyngodon idellus</i>      | H                | RL                  | Yes                         | Yes                       |
|               | <i>Culter alburnus</i>               | C                | L                   | Yes                         | Yes                       |
|               | <i>Culter mongolicus</i>             | C                | L                   | Yes                         | Yes                       |
|               | <i>Culter oxycephaloides</i>         | C                | L                   | No                          | Yes                       |
|               | <i>Cultrichthys erythropterus</i>    | C                | L                   | No                          | Yes                       |
|               | <i>Cyprinus carpio</i>               | O                | L                   | No                          | Yes                       |
|               | <i>Elopichthys bambusa</i>           | C                | P                   | No                          | Yes                       |
|               | <i>Hemiculter leucisculus</i>        | O                | L                   | No                          | Yes                       |
|               | <i>Hypophthalmichthys molitrix</i>   | F                | RL                  | Yes                         | Yes                       |
|               | <i>Megalobrama amblycephala</i>      | H                | L                   | Yes                         | Yes                       |
|               | <i>Megalobrama skolkovii</i>         | H                | L                   | Yes                         | Yes                       |
|               | <i>Misgurnus anguillicaudatus</i>    | O                | L                   | No                          | Yes                       |
|               | <i>Mylopharyngodon piceus</i>        | O                | RL                  | Yes                         | Yes                       |
|               | <i>Opsariichthys bidens</i>          | C                | P                   | No                          | Yes                       |
|               | <i>Parabramis pekinensis</i>         | H                | L                   | Yes                         | Yes                       |
|               | <i>Paracheilognathus imberbis</i>    | D                | L                   | No                          | No                        |
|               | <i>Paramisgurnus dabryanus</i>       | D                | L                   | No                          | No                        |
|               | <i>Pseudobrama simoni</i>            | D                | L                   | No                          | Yes                       |
|               | <i>Pseudolaubuca sinensis</i>        | O                | L                   | No                          | Yes                       |
|               | <i>Pseudorasbora parva</i>           | O                | L                   | No                          | No                        |
|               | <i>Rhodeus ocellatus</i>             | D                | L                   | No                          | No                        |
|               | <i>Sarcocheilichthys nigripinnis</i> | O                | L                   | No                          | No                        |
|               | <i>Saurogobio dabryi</i>             | O                | L                   | No                          | Yes                       |
|               | <i>Spinibarbus sinensis</i>          | O                | L                   | No                          | No                        |
|               | <i>Squalidus argentatus</i>          | O                | L                   | No                          | No                        |
|               | <i>Squaliobarbus curriculus</i>      | O                | L                   | No                          | Yes                       |
|               | <i>Xenocypris microlepis</i>         | D                | L                   | No                          | Yes                       |
| Siluriformes  | <i>Ictalurus punctatus</i>           | C                | L                   | No                          | Yes                       |
|               | <i>Pelteobagrus fulvidraco</i>       | C                | L                   | No                          | Yes                       |
|               | <i>Pelteobagrus nitidus</i>          | C                | L                   | No                          | Yes                       |
|               | <i>Pelteobagrus vachelli</i>         | C                | L                   | No                          | Yes                       |
|               | <i>Pseudobagrus truncatus</i>        | C                | P                   | No                          | Yes                       |
|               | <i>Silurus asotus</i>                | C                | L                   | No                          | Yes                       |
| Beloniformes  | <i>Hyporhamphus intermedius</i>      | O                | L                   | No                          | Yes                       |
| Salmoniformes | <i>Neosalanx taihuensis</i>          | O                | L                   | No                          | Yes                       |
| Perciformes   | <i>Channa argus</i>                  | C                | L                   | No                          | Yes                       |
|               | <i>Ctenogobius giurinus</i>          | C                | L                   | No                          | No                        |
|               | <i>Micropercops swinhonis</i>        | C                | L                   | No                          | No                        |
|               | <i>Mastacembelus aculeatus</i>       | C                | L                   | No                          | No                        |

|                              |   |   |     |     |
|------------------------------|---|---|-----|-----|
| <i>Micropterus salmoides</i> | C | L | No  | Yes |
| <i>Siniperca chuatsi</i>     | C | L | Yes | Yes |
| <i>Siniperca kneri</i>       | C | L | No  | Yes |

---

## References

1. Yang, G.; Yang, G.R.; Liu, J.L. Plankton Resource Survey of Dan Jiangkou Reservoir. *Journal of Hubei Agricultural College* **1996**, *16*, 38–42.
2. Han, D.J.; Pen, J.H.; Jian, D.; Zhou, Q.; Wu, H.J. The Assessment of Food Organism Resources and Trophic States of Danjiangkou Reservoir. *Journal of Lake Science* **1997**, *09*, 57–62.
3. Kong, L.H.; Cai, Q.H.; Xu, Y.Y.; Wang, L.; Zhang, M. Seasonal Change Features of Rotifer Community and Its Correlation with Environmental Factors in Danjiangkou Reservoir. *Journal of Lake Sciences* **2010**, *22*, 941–949.
4. Wang, J.J.; Liu, W.J.; Zhu, L.Y.; Zhang, M.L. Community Structure of Planktonic Crustaceans in Danjiangkou Reservoir and Effects of Environmental Factors on It. *Transactions of Oceanology and Limnology* **2016**, 77–87.
5. Yin, Z.; Liao, C.S.; Liu, J.S Eds. *Carrying Capacity of Stock Enhancement and Aquaculture and Stocking Regulation Techniques in Danjiangkou Reservoir*; Science Press: Beijing, 2021.
